# Supplementary material for: Evaluation of the Roche cobas MTB and MTB-RIF/INH Assays in Samples from Germany and Sierra Leone
Source: PubMed Central journal article supplement (PMC8091830; doi:10.1128/jcm.02983-20), 2021-04-20
Supplement: JCM.02983-20-s0001.pdf [file JCM.02983-20-s0001.pdf]

## Supplemental material

**Supplemental Table 1. Agreement on detection of *Mycobacterium tuberculosis* complex DNA from primary samples between cobas MTB and Xpert MTB/RIF.** Xpert MTB/RIF results were available for a subset 128 samples investigated in this study. CI, confidence interval; MTBC, *Mycobacterium tuberculosis* complex.

| cobas MTB                           | Xpert MTB/RIF       |          |                   |
|-------------------------------------|---------------------|----------|-------------------|
|                                     | Positive            | Negative | Total             |
| MTBC positive                       | 70                  | 0        | 70                |
| MTBC negative                       | 1 <sup>1</sup>      | 57       | 58                |
| Total                               | 71                  | 57       | 128               |
| Positive Percent Agreement (95% CI) | 98.6 (92.4, 99.9)   |          |                   |
| Negative Percent Agreement (95% CI) | 100.0 (93.7, 100.0) |          |                   |
| Overall Percent Agreement (95% CI)  |                     |          | 99.2 (95.7, 99.9) |

<sup>1</sup> The single discordant sample was smear-negative and MTBC culture-positive.

**Supplemental Table 2. Frequency of rifampicin and isoniazid resistance by smear microscopy and country of sample origin.** CRS, composite reference standard (phenotypic drug susceptibility testing and line probe assay); DE, Germany; INH, isoniazid; n, number of samples; RIF, rifampicin; SL, Sierra Leone.

| <b>Drug</b>  | <b>Smear</b> | <b>CRS</b>   | <b>cobas</b> | <b>n, DE</b> | <b>n, SL</b> | <b>n, Total</b> |           |
|--------------|--------------|--------------|--------------|--------------|--------------|-----------------|-----------|
| RIF          | Positive     | Resistant    | Positive     | 1            | 35           | 36              |           |
|              |              |              | Negative     | 1            | 3            | 4               |           |
|              |              |              | Invalid      | 0            | 0            | 0               |           |
|              |              | Sensitive    | Positive     | 0            | 1            | 1               |           |
|              |              |              | Negative     | 28           | 1            | 29              |           |
|              |              |              | Invalid      | 1            | 0            | 1               |           |
|              |              | <b>Total</b> |              |              | <b>31</b>    | <b>40</b>       | <b>71</b> |
|              |              | Negative     | Resistant    | Positive     | 0            | 2               | 2         |
|              |              |              |              | Negative     | 1            | 0               | 1         |
|              | Invalid      |              |              | 1            | 0            | 1               |           |
|              | Sensitive    |              | Positive     | 0            | 0            | 0               |           |
|              |              |              | Negative     | 10           | 1            | 11              |           |
|              |              |              | Invalid      | 2            | 0            | 2               |           |
|              | <b>Total</b> |              |              | <b>14</b>    | <b>3</b>     | <b>17</b>       |           |
|              | <b>Total</b> |              |              | <b>45</b>    | <b>43</b>    | <b>88</b>       |           |
|              | INH          | Positive     | Resistant    | Positive     | 3            | 29              | 32        |
|              |              |              |              | Negative     | 0            | 10              | 10        |
| Invalid      |              |              |              | 0            | 0            | 0               |           |
| Sensitive    |              |              | Positive     | 0            | 0            | 0               |           |
|              |              |              | Negative     | 27           | 1            | 28              |           |
|              |              |              | Invalid      | 1            | 0            | 1               |           |
| <b>Total</b> |              |              | <b>31</b>    | <b>40</b>    | <b>71</b>    |                 |           |
| Negative     |              |              | Resistant    | Positive     | 2            | 2               | 4         |
|              |              |              |              | Negative     | 1            | 0               | 1         |
|              |              | Invalid      |              | 0            | 0            | 0               |           |
|              |              | Sensitive    | Positive     | 0            | 0            | 0               |           |
|              |              |              | Negative     | 9            | 1            | 10              |           |
|              |              |              | Invalid      | 2            | 0            | 2               |           |
| <b>Total</b> |              |              | <b>14</b>    | <b>3</b>     | <b>17</b>    |                 |           |
| <b>Total</b> |              |              | <b>45</b>    | <b>43</b>    | <b>88</b>    |                 |           |
